# Supplementary material
Source: MDPI journal article supplement (https://www.mdpi.com/2571-8789/4/3/39)
Supplement: s1 [file s1]

2018

2019

spring triticale

stubble crops

Termination term  
spring (mulch)  
vs autumn

spring triticale

stubble crops

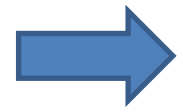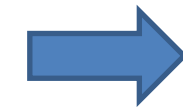

Figure S1: Graphic scheme of experimental design

| First experimental factor                               | Second experimental factor     | Third experimental factor                                                             |
|---------------------------------------------------------|--------------------------------|---------------------------------------------------------------------------------------|
| STUBBLE CROP SPECIES                                    | STUBBLE CROPS TERMINATION TERM | SPRING TRITICALE MANAGEMENT                                                           |
| White mustard<br><i>(Sinapis alba L.)</i>               | Spring (mulch)                 | (NAT) without fertilization and pesticides                                            |
| Buckwheat<br><i>(Fagopyrum esculentum Moench)</i>       | Autumn                         | (MF) mineral fertilization only (NPK 80:80:120)                                       |
| Tansy phacelia<br><i>(Phacelia tanacetifolia Benth)</i> |                                | (PEST) mineral fertilization (NPK 80:80:120) with subsequently pesticides application |

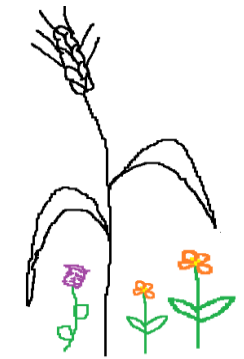

NAT

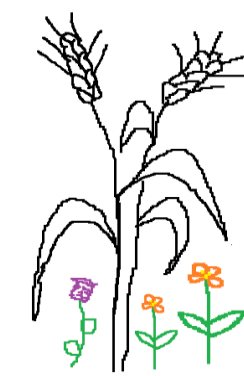

MF

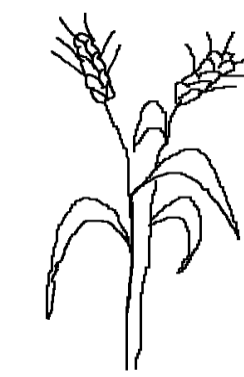

PEST

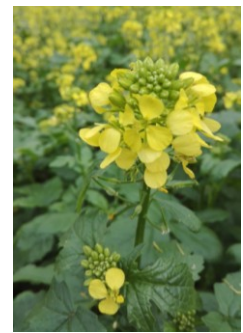

White mustard

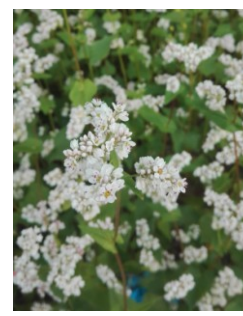

Buckwheat

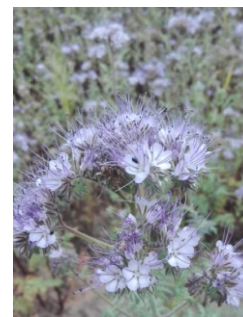

Tansy phacelia
